# Supplementary material for: A triple-diazonium reagent for virus crosslinking and the synthesis of an azo-linked molecular cage
Source: Royal Society of Chemistry journal article supplement (doi:10.1039/d2ob01583h), 2022-01-01

# Supporting Information

## Triple-diazonium reagent for virus crosslinking and the synthesis of an azo-linked molecular cage

Lijun He,<sup>a</sup> Chenyang Jiang,<sup>a</sup> Zhuoyue Chen,<sup>a</sup> Dejun Ma,<sup>\*b</sup> Long Yi<sup>\*a</sup> and Zhen Xi<sup>b</sup>

<sup>a</sup>State Key Laboratory of Organic-Inorganic Composites and Beijing Key Lab of Bioprocess, Beijing University of Chemical Technology, Beijing 100029, China. Email: yilong@mail.buct.edu.cn

<sup>b</sup>State Key Laboratory of Elemento-Organic Chemistry and Department of Chemical Biology, College of Chemistry, National Pesticide Engineering Research Center, Collaborative Innovation Center of Chemical Science and Engineering, Nankai University, Tianjin 300071, China. Email: madejun@nankai.edu.cn

### Table of contents

|                                                                   |    |
|-------------------------------------------------------------------|----|
| 1. Reagents and instruments                                       | 2  |
| 2. Synthesis                                                      | 2  |
| 3. General procedure for spectroscopic studies                    | 4  |
| 4. Construction of TMV-based hydrogel                             | 6  |
| 5. Synthesis and characterization of an azo-linked molecular cage | 7  |
| 6. X-ray crystallography studies of <b>6</b>                      | 11 |
| 7. Supporting reference                                           | 15 |
| 8. Supplementary NMR and HRMS spectra                             | 16 |

## 1. Reagents and instruments

All chemicals and solvents used for synthesis were purchased from commercial suppliers and applied directly in the experiment without further purification. The progress of the reaction was monitored by TLC on pre-coated silica plates (Merck 60F-254, 250  $\mu\text{m}$  in thickness), and spots were visualized by UV light. Merck silica gel 60 (70-200 mesh) was used for general column chromatography purification.  $^1\text{H}$  NMR and  $^{13}\text{C}$  NMR spectra were recorded on a Bruker 400 spectrometer. Chemical shifts are reported in parts per million relatives to internal standard tetramethylsilane ( $\text{Si}(\text{CH}_3)_4 = 0.00$  ppm) or residual solvent peaks ( $\text{CDCl}_3 = 7.26$  ppm,  $\text{DMSO}-d_6 = 2.50$  ppm,  $\text{MeOD} = 3.31$  ppm).  $^1\text{H}$  NMR coupling constants ( $J$ ) are reported in Hertz (Hz), and multiplicity is indicated as the following: s (singlet), d (doublet), m (multiplet), hept (heptet). High-resolution mass spectrum (HRMS) was obtained on an Agilent 6540 UHD Accurate-Mass Q-TOFLC/MS. The UV-visible spectra were recorded on a UV-6000 UV-VIS-NIR-spectrophotometer (METASH, China).

## 2. Synthesis

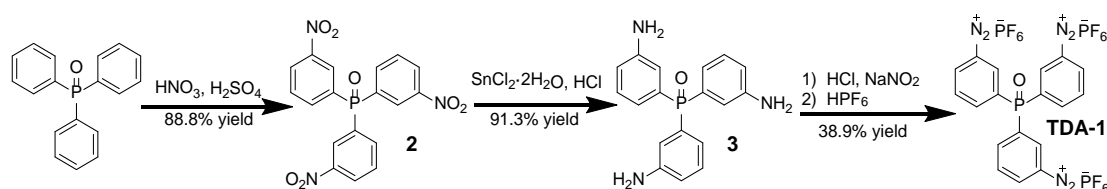

**Synthesis of 2.** Triphenylphosphine oxide (4.6 g, 16.5 mmol) dissolved in concentrated sulfuric acid (35 mL) was dropwise added to a mixed solution of concentrated  $\text{H}_2\text{SO}_4$  (15 mL) and concentrated  $\text{HNO}_3$  (15 mL) at  $0^\circ\text{C}$ . After stirring at room temperature for 6 hours, the reaction mixture was poured into ice-cooled  $\text{H}_2\text{O}$  (400 mL), and the precipitated yellow solid was collected by filtration. The resulted solid was recrystallized using EtOH to give the desired product as a pale yellow powdery solid (6.5 g, 89% yield).  $^1\text{H}$  NMR (400 MHz,  $\text{DMSO}-d_6$ )  $\delta$  8.57 – 8.46 (m, 6H), 8.25 – 8.18 (m, 3H), 7.95 – 7.89 (m, 3H).

**Synthesis of 3.** A mixture of compound **2** (3.34 g, 8.0 mmol) and stannous chloride dihydrate (18.02 g, 80.0 mmol) in 50 mL of EtOH and 25 mL of concentrated HCl was stirred at 40 °C for 6 hours until the reaction was completed, which was monitored by TLC (CH<sub>2</sub>Cl<sub>2</sub> : MeOH = 5:1). The pH of the reaction solution was adjusted to 7-8 with 30% NaOH solution under an ice bath. Then, the filtrate was extracted with EtOAc, and the resulted organic layer was concentrated under reduced pressure. The crude product was purified by silica gel column chromatography (CH<sub>2</sub>Cl<sub>2</sub>: MeOH = 10:1) to obtain **3** (2.36 g, 91%). <sup>1</sup>H NMR (400 MHz, MeOD) δ 7.26 – 7.20 (m, 3H), 6.99 – 6.84 (m, 9H); <sup>31</sup>P NMR (162 MHz, MeOD) δ 35.31.

**Synthesis of triple-diazonium reagent TDA-1.** Compound **3** (1.38g, 4.3mmol) was dissolved in 30 mL concentrated HCl and 15 mL H<sub>2</sub>O. A water solution of NaNO<sub>2</sub> (1.79 g, 25.6 mmol) was slowly added to the **3** solution at 0-5 °C. After stirring for 1 hour, 5.5 mL of 60% HPF<sub>6</sub> was added to the mixture for stirring another 1 hour.<sup>1</sup> The product was collected by filtration and washed with ice-cold water, MeOH and CH<sub>2</sub>Cl<sub>2</sub> to obtain a white solid **TDA-1** (1.32 g, 39% yield). <sup>1</sup>H NMR (400 MHz, DMSO-*d*<sub>6</sub>) δ 9.26 (d, *J* = 12.5 Hz, 3H), 8.99 (d, *J* = 8.3 Hz, 3H), 8.53 – 8.46 (m, 3H), 8.30 – 8.15 (m, 3H); <sup>13</sup>C NMR (101 MHz, DMSO-*d*<sub>6</sub>) δ 142.7, 137.0, 136.4, 132.5, 132.2, 118.5; <sup>31</sup>P NMR (162 MHz, DMSO-*d*<sub>6</sub>) δ 19.67, -144.21 (hept, *J*<sub>P-F</sub> = 711.3 Hz). HRMS (ESI): *m/z* [M-PF<sub>6</sub>]<sup>+</sup> calculated for C<sub>18</sub>H<sub>12</sub>F<sub>12</sub>N<sub>6</sub>OP<sub>3</sub><sup>+</sup>: 649.0088; found: 649.0070.

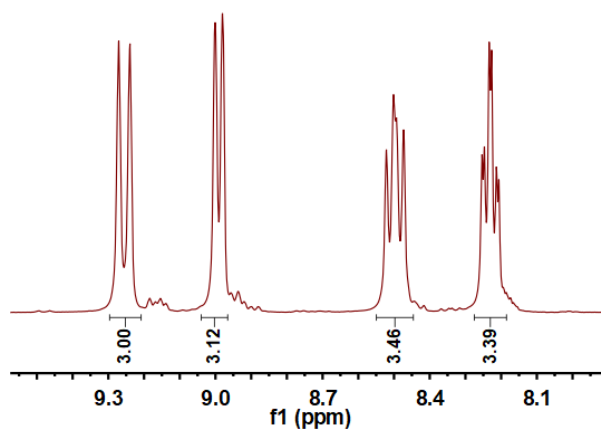

**Fig. S1** Partial <sup>1</sup>H NMR (400 MHz, DMSO-*d*<sub>6</sub>) spectrum of **TDA-1**. The high chemical shift values of aromatic H suggest the existence of positively charged substituents, and the integral values of the peaks imply that transformation of amine to diazonium moieties should be efficient.

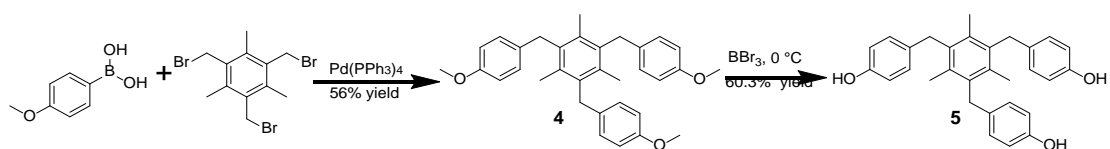

**Synthesis of 4.**<sup>2</sup> 4-Methoxyphenylboronic acid (2.85 g, 18.8 mmol) and Na<sub>2</sub>CO<sub>3</sub> aqueous solution (2 M, 23.5 mL) were added to a THF solution of 2,4,6-tribromomethyltrimethylbenzene (1.69 g, 4.23 mmol). The resulted mixture was degassed for 20 minutes, and the reaction flask was filled with argon, and then Pd(PPh<sub>3</sub>)<sub>4</sub> (698 mg, 0.63 mmol, 15 mol%) was quickly added. After stirring for 24 hours, the reaction mixture was filtrated. The filtrate was extracted by EtOAc, and the resulted organic layer was concentrated under reduced pressure. The crude product was purified by silica gel column chromatography (petroleum ether : EtOAc = 100 : 6) to give compound **4** (1.138 g, 56% yield). <sup>1</sup>H NMR (400 MHz, CDCl<sub>3</sub>) δ 6.95 (d, *J* = 8.7 Hz, 6H), 6.80 (d, *J* = 8.7 Hz, 6H), 4.08 (s, 6H), 3.78 (s, 9H), 2.15 (s, 9H); <sup>13</sup>C NMR (101 MHz, CDCl<sub>3</sub>) δ 157.8, 135.3, 134.7, 132.5, 128.9, 113.9, 55.4, 35.4, 16.8.

**Synthesis of 5.** BBr<sub>3</sub> (1.8 mL, 19.8 mmol) in 20 mL CH<sub>2</sub>Cl<sub>2</sub> was slowly added to compound **4** (1.06 g, 2.2 mmol) in 20 mL CH<sub>2</sub>Cl<sub>2</sub> at 0 °C under the protection of N<sub>2</sub>. After stirring under N<sub>2</sub> for one day, MeOH (40 mL) was slowly added to the reaction mixture in an ice bath to quench the reaction. The solvent was removed under reduced pressure, and the residue was dissolved with EtOAc. The organic layer was washed with brine, dried with anhydrous Na<sub>2</sub>SO<sub>4</sub>, and concentrated under reduced pressure. Finally, the crude product was purified by silica gel column chromatography (CH<sub>2</sub>Cl<sub>2</sub> : MeOH = 100 : 3) to give a white solid **5** (582 mg, 60%). <sup>1</sup>H NMR (400 MHz, DMSO-*d*<sub>6</sub>) δ 9.11 (s, 3H), 6.77 (d, *J* = 8.4 Hz, 6H), 6.64 (d, *J* = 8.5 Hz, 6H), 3.94 (s, 6H), 2.06 (s, 9H); <sup>13</sup>C NMR (101 MHz, CDCl<sub>3</sub>) δ 155.2, 135.1, 133.5, 130.0, 128.4, 115.2, 34.6, 16.3.

### 3. General procedures for spectroscopic studies

**TDA-1** and 2,6-dimethylphenol (2,6-DMP) were dissolved in DMSO to prepare 1 mM and 100 mM stock solutions, respectively. UV spectra were measured in PBS (50

mM, pH 7.4, containing 5% DMSO) at 25 °C. All tests were carried out in a 3 mL quartz cuvette containing 2 mL of the tested solution.

For absorption spectrum tests: a mixture of 40  $\mu\text{L}$  stock solution of **TDA-1** (final 20  $\mu\text{M}$ ) and 1954  $\mu\text{L}$  PBS buffer was treated with 6  $\mu\text{L}$  2,6-DMP (final 300  $\mu\text{M}$ ). The resulted sample was monitored by UV-Vis spectroscopy at 220-600 nm with a certain time interval.

For kinetic tests: 20  $\mu\text{M}$  **TDA-1** was mixed with different concentrations of 2,6-DMP (150, 200, 250, 300  $\mu\text{M}$ ) in 2 mL PBS buffer, respectively, and the time-dependent absorbance intensities at 360 nm were recorded. The pseudo-first-order rate constant,  $k_{\text{obs}}$  was determined by fitting the data with single exponential function. The linear fitting between  $k_{\text{obs}}$  and [2,6-DMP] gives the reaction rate constant  $k_2$ .

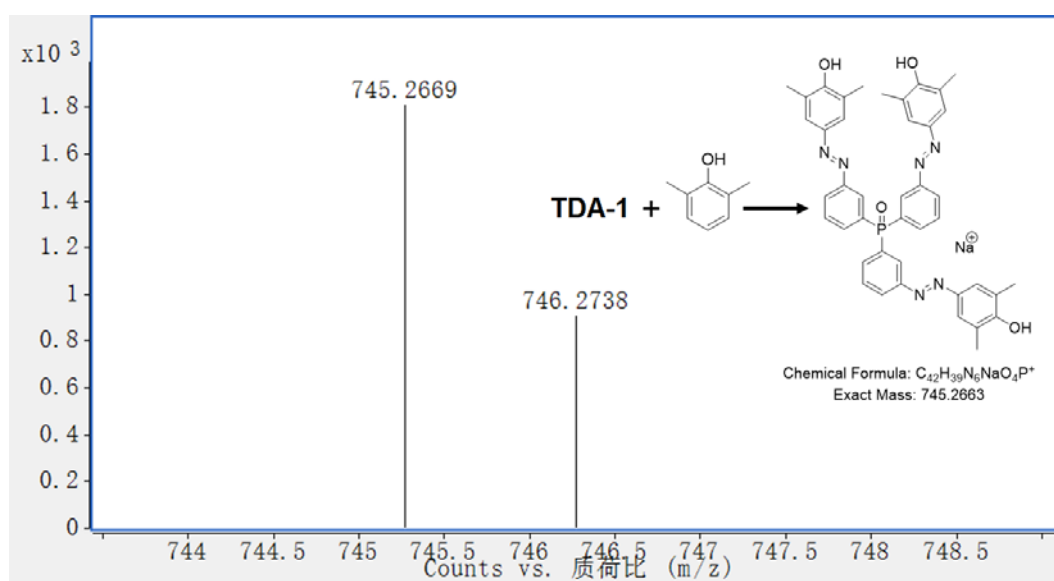

**Fig. S2** HRMS analysis of the reaction aliquot of **TDA-1** (1 mM) incubated with 2,6-DMP (10 mM) in PBS buffer (50 mM, pH 7.4, containing 5% DMSO) for 2 hours. The m/z  $[\text{M}+\text{Na}]^+$  calculated for  $\text{C}_{42}\text{H}_{39}\text{N}_6\text{O}_4\text{P}^+$ : 745.2663, found: 745.2669.

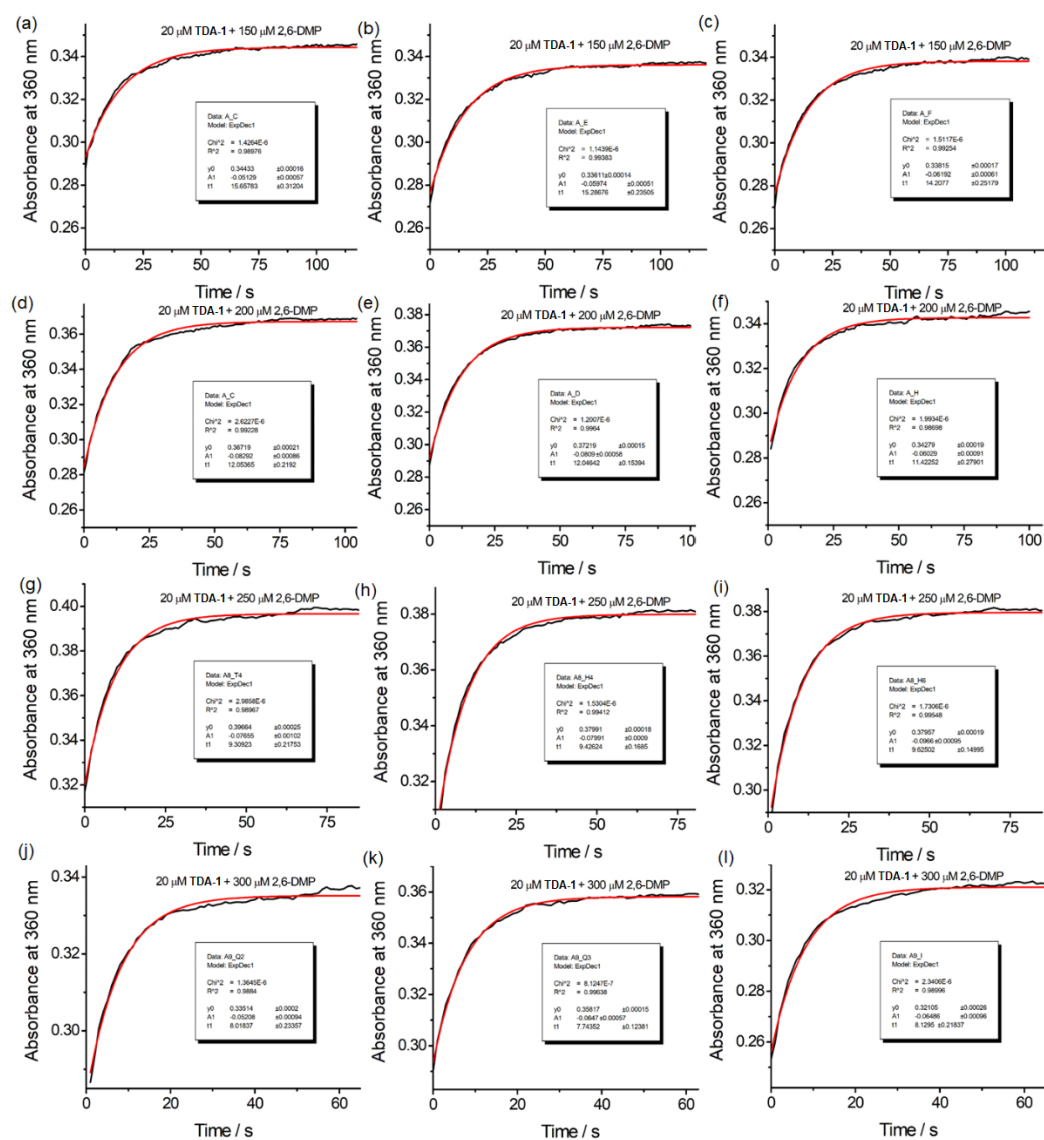

**Fig. S3** Time-dependent UV-Vis absorbance intensities at 360 nm of **TDA-1** (20  $\mu\text{M}$ ) in the presence of different concentrations of 2,6-DMP (a-c. 150  $\mu\text{M}$ ; d-f. 200  $\mu\text{M}$ ; g-i. 250  $\mu\text{M}$ ; j-l. 300  $\mu\text{M}$ ). The red lines represent the best fitting of the data to a single exponential function.

#### 4. Construction of TMV-based hydrogel

TMV purification:<sup>3</sup> TMV-inoculated tobacco leaves were ground fully and mixed with 25 mL phosphate buffer (0.2 mM, pH 7.0) including 250  $\mu\text{L}$   $\beta$ -mercaptoethanol (1%, v/v) on ice. After the filtration with two-layer screen cloth, the clear lysate was mixed with *N*-butyl alcohol (8%, v/v) for 15 min incubation. After centrifugation at 10,000 $\times$ g for 20 min, the precipitate was dissolved again with 2 mL 0.01 M phosphate

buffer (pH 7.0) on ice and stirred for 6 h. After centrifugation, the pellet was resuspended in 5 mL 0.01 M phosphate buffer (pH 7.0) for 2 h. After centrifugation, the supernatant was then added with NaCl (4%, w/v) and PEG6000 (4%, w/v) for overnight precipitation. After centrifugation, the precipitate was resuspended in 2 mL 0.01 M phosphate buffer (pH 7.0) for 6 h. After centrifugation at 10,000×g for 5 min, the final virus suspension was obtained and the virus purity was evaluated according to the indicated ratio of  $A_{280}/A_{260}$  (0.84) and  $A_{260}/A_{248}$  (1.09). TMV concentration was calculated according to  $C(\text{mg/mL}) = A_{260}/3.1$ . TMV solution was stored at 4 °C for the following study.

With the TMV in hand, we constructed TMV-based hydrogel in PBS buffer (100 mM, pH 6.0) using triple-diazonium reagent **TDA-1**. First, **TDA-1** was dissolved in DMSO to prepare a 25-100 mM stock solution, and the concentration of TMV matrix was 2.5 mg/mL. TMV hydrogels were prepared by gently mixing TMV and different concentrations of **TDA-1** in glass vials at room temperature for 0-30 minutes to evaluate the gelation conditions. The gelation could be observed directly.

## 5. Synthesis and characterization of an azo-linked molecular cage

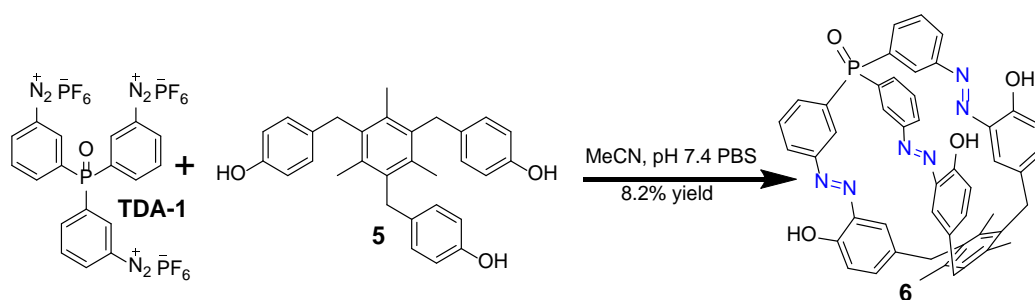

The coupling reaction between **TDA-1** and **5a** to form a molecular cage was unsuccessful after several attempts, which may be due to its unfavorable configuration (Fig. S4).

It is important to control the concentrations of **TDA-1** and **5** due to their multiple reactive sites. Firstly, we built an experiment device for the intramolecular coupling (Fig. S5). The coupling reaction could be carried out in neutral, weakly alkaline or

even weakly acidic solutions. We found the coupling reaction under pH 6.0 could lead to several unwanted species (Fig. S6). Finally, the optimized reaction was performed at pH 7.4, and the reactants were slowly mixed. The specific operations are as follows:

Compound **5** (95 mg, 0.22 mmol) was dissolved in 50 mL CH<sub>3</sub>CN and 25 mL PBS buffer (50 mM, pH 7.4), and **TDA-1** (158 mg, 0.2 mmol) was dissolved in 50 mL CH<sub>3</sub>CN and 25 g ice. At the same time, the both solutions were slowly dropped into a three-neck flask containing 100 mL CH<sub>3</sub>CN under ice bath conditions, and the droplet rate was about 1 drop/s. After stirring for 1 hour, CH<sub>3</sub>CN was removed under reduced pressure, and the water solution was extracted with EtOAc. After washing with saturated brine and drying with Na<sub>2</sub>SO<sub>4</sub>, the organic layer was concentrated under reduced pressure, and the resulted crude product was purified by silica gel column chromatography to obtain compound **6** (13 mg, 8.2%). <sup>1</sup>H NMR (400 MHz, CDCl<sub>3</sub>) δ 12.54 (s, 3H), 8.41 – 8.33 (m, 3H), 7.85 (d, *J* = 7.8 Hz, 3H), 7.79 (d, *J* = 12.2 Hz, 3H), 7.75 – 7.68 (m, 3H), 7.45 – 7.40 (m, 3H), 7.36 (s, 3H), 7.04 (d, *J* = 8.5 Hz, 3H), 4.19 (s, 6H), 2.19 (s, 9H); <sup>13</sup>C NMR (101 MHz, CDCl<sub>3</sub>) δ 151.4, 150.9, 138.3, 135.8, 134.7, 134.5, 134.1, 133.5, 133.8, 131.9, 131. 130.3, 129.1, 118.8, 118.0, 35.5, 16.9; HRMS (ESI): *m/z* [M+H]<sup>+</sup> calculated for C<sub>48</sub>H<sub>40</sub>F<sub>12</sub>N<sub>6</sub>O<sub>4</sub>P<sup>+</sup>: 795.2843; found: 795.2843.

UV-vis spectrum of **6** was measured in H<sub>2</sub>O at 25 °C. **6** was dissolved in DMSO to prepare a 0.5 mM stock solution. Then, 40 μL stock solution of **6** (final 10 μM) was added into 1960 μL H<sub>2</sub>O.

HPLC analysis of **6** was tested using the DMSO solution. Conditions: ANGELA TECHNOLOGIES HPLC LC-10F; C18 column with 4.6 mm x 250 mm; detection wavelength: 318 nm. Buffer A: 0.1% (v/v) trifluoroacetic acid in water; buffer B: 0.1% (v/v) trifluoroacetic acid in MeOH; flow: 1 mL/min. The elution conditions were: 0-5 min, buffer B: 5-100%; 5-55 min, buffer B: 100-100%; 55-60 min, buffer B: 100-5%.



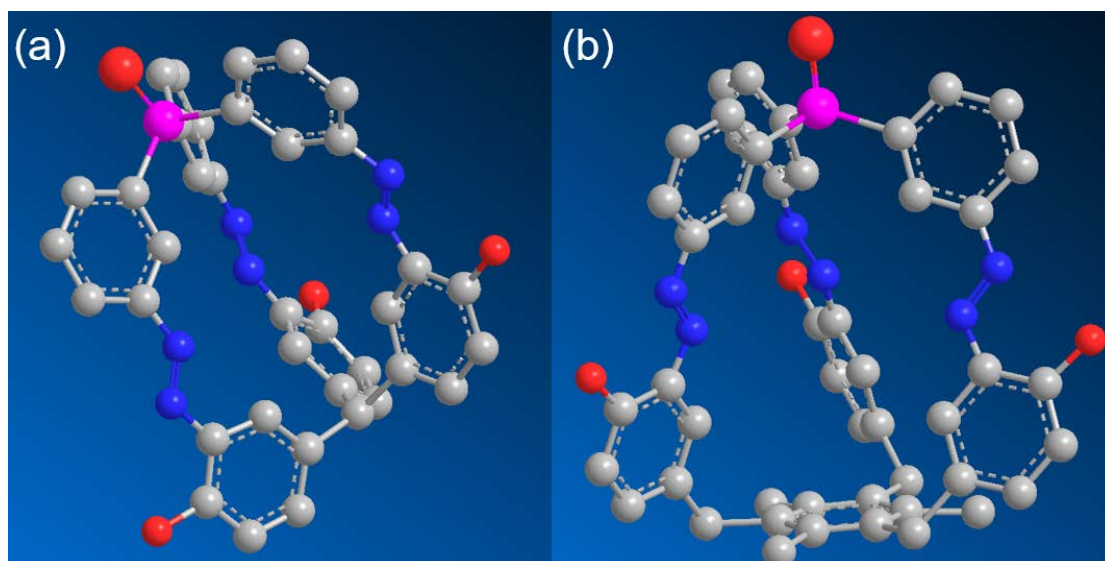

**Fig. S4** ChemDraw 3D model structures (MM2 energy-minimized) of proposed CMCs based on 4,4',4''-methanetriyltriphenol **5a** (a) or **5** (b). The minimum energies were calculated as 135 kcal/mol and 69 kcal/mol for (a) and (b), respectively.

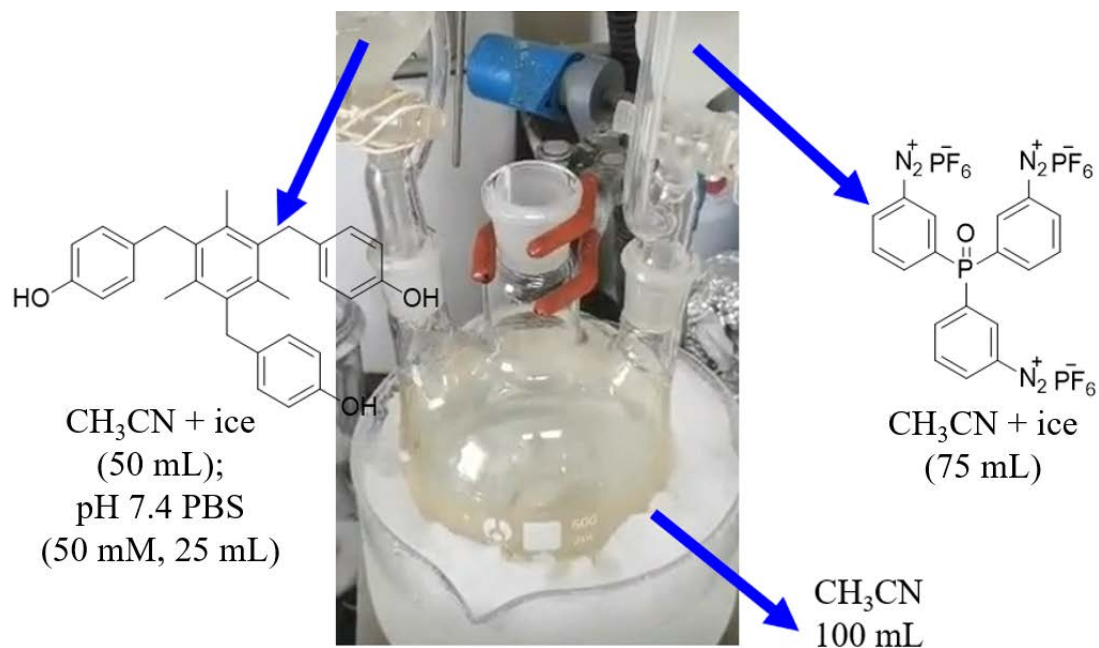

**Fig. S5** Illustration of a low-concentration crosslinking device. 100 mL Acetonitrile was added to a three-neck flask under ice bath, and the two reactants in acetonitrile and ice water were added dropwise through a constant pressure dropping funnel at a rate of about 1 drop/s, respectively.

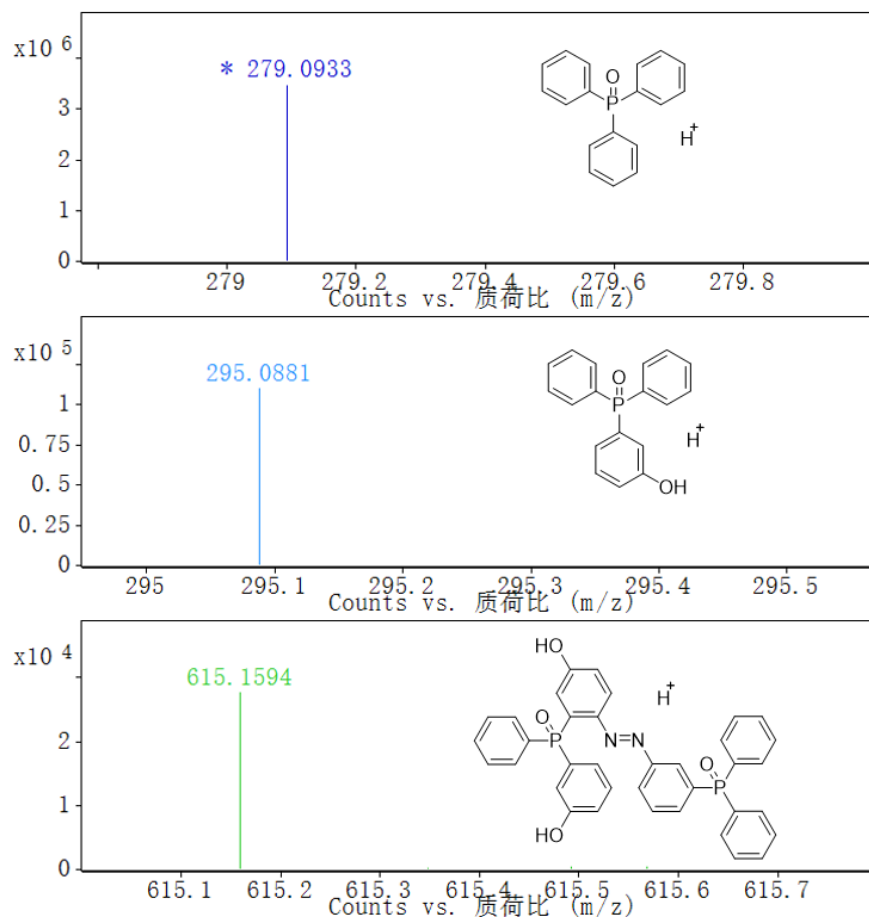

**Fig. S6** HRMS analysis of the coupling reaction between **TDA-1** and **5** at pH 6.0. Under this condition, some by-products were suggested as inset.

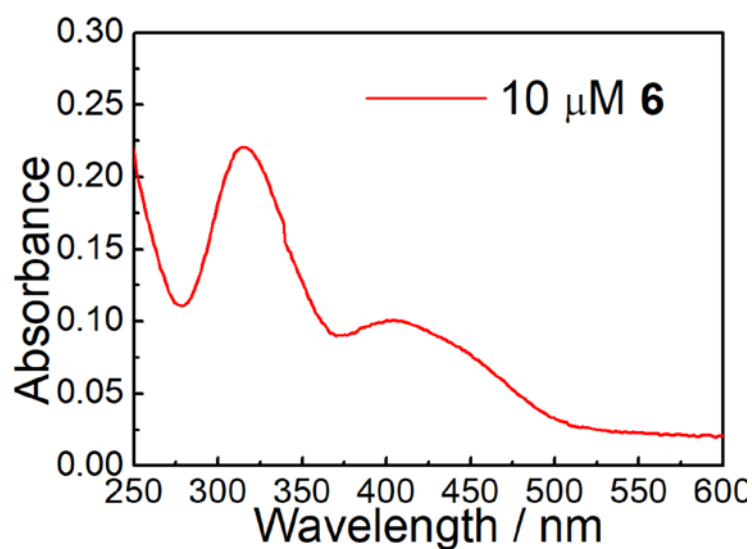

**Fig. S7** The UV-vis absorbance spectrum of **6** ( $10 \mu\text{M}$ ). The absorption peaks located at 315 nm and 405 nm should be due to the  $\pi \rightarrow \pi^*$  and  $n \rightarrow \pi^*$  transitions of the azo bond in **6**, respectively.

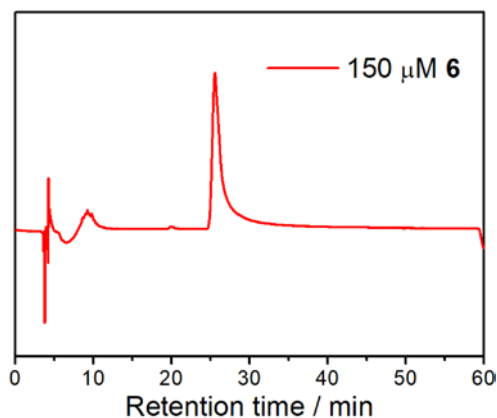

**Fig. S8** HPLC trace of **6**. Detection wavelength: 318 nm.

## 6. X-ray crystallography studies of **6**

Crystals of **6** were obtained by recrystallization from chloroform and acetone (v:v, 1:3). The deep red single crystals were emerged after several days at 4 °C.

The single-crystal X-ray diffraction data set was collected on Gemin E diffractometer with Mo target. Used Olex2,<sup>4</sup> and the structure was solved by direct methods and refined by full-matrix least-squares on  $F^2$  using SHELXL-97.<sup>5</sup> Details of the data collection and the structure refinements are summarized in Table S1. Crystallographic data (CIF) file for the structure has been deposited with the Cambridge Crystallographic Data Centre as supplementary (CCDC 2182065 for **6**). Copies of the data can be obtained, free of charge, on application to CCDC, 12 Union Road, Cambridge CB2 1EZ, United Kingdom, P: +44 (0)1223 336408, F: +44 (0)1223 336033 (e-mail: deposit@ccdc.cam.ac.uk).

**Table S1** Crystal data and structure refinement for **6**

|                         |                                                                                                                                        |
|-------------------------|----------------------------------------------------------------------------------------------------------------------------------------|
| Empirical formula       | C <sub>48</sub> H <sub>39</sub> N <sub>6</sub> O <sub>4</sub> P, 1.27979(CHCl <sub>3</sub> ), 0.72021(C <sub>3</sub> H <sub>6</sub> O) |
| Formula weight          | 989.42                                                                                                                                 |
| Temperature / K         | 112.6(5)                                                                                                                               |
| Crystal system          | monoclinic                                                                                                                             |
| Space group             | P2 <sub>1</sub> /n                                                                                                                     |
| a / Å, b / Å, c / Å     | 12.7423(4), 15.4301(6), 25.1881(8)                                                                                                     |
| α/°, β/°, γ/°           | 90.00, 99.673(3), 90.00                                                                                                                |
| Volume / Å <sup>3</sup> | 4882.0(3)                                                                                                                              |
| Z                       | 4                                                                                                                                      |

|                                                                |                                                              |
|----------------------------------------------------------------|--------------------------------------------------------------|
| $\rho_{\text{calc}} / \text{mg mm}^{-3}$                       | 1.346                                                        |
| $\mu / \text{mm}^{-1}$                                         | 0.320                                                        |
| F(000)                                                         | 2053                                                         |
| Crystal size / $\text{mm}^3$                                   | $0.41 \times 0.35 \times 0.30$                               |
| $2\Theta$ range for data collection                            | 6.2 to $52^\circ$                                            |
| Index ranges                                                   | $-15 \leq h \leq 15, -19 \leq k \leq 14, -31 \leq l \leq 30$ |
| Reflections collected                                          | 25542                                                        |
| Independent reflections                                        | 9364[R(int) = 0.0454 (inf-0.9Å)]                             |
| Data/restraints/parameters                                     | 9364/7/652                                                   |
| Goodness-of-fit on $F^2$                                       | 1.032                                                        |
| Final R indexes [ $I > 2\sigma(I)$ i.e. $F_o > 4\sigma(F_o)$ ] | $R_1 = 0.0598, wR_2 = 0.1258$                                |
| Final R indexes [all data]                                     | $R_1 = 0.0863, wR_2 = 0.1404$                                |
| Largest diff. peak/hole / $e \text{ \AA}^{-3}$                 | 0.642/-0.631                                                 |
| Flack Parameters                                               | N                                                            |
| Completeness                                                   | 0.9969                                                       |

**Table S2** Bond length for **6**.

| Atom | Atom | Length/Å   | Atom | Atom | Length/Å |
|------|------|------------|------|------|----------|
| P1   | O1   | 1.4851(19) | C30  | C56  | 1.385(4) |
| P1   | C12  | 1.808(2)   | C31  | C53  | 1.394(3) |
| P1   | C18  | 1.807(3)   | C32  | N41  | 1.413(4) |
| P1   | C27  | 1.801(3)   | C32  | C50  | 1.406(4) |
| O4   | C25  | 1.356(3)   | C32  | C51  | 1.408(4) |
| O3   | C51  | 1.352(3)   | C33  | C44  | 1.394(4) |
| N10  | C33  | 1.423(3)   | C34  | C40  | 1.407(4) |
| N10  | N41  | 1.270(3)   | C34  | C54  | 1.522(4) |
| N11  | N14  | 1.265(3)   | C35  | C53  | 1.381(4) |
| N11  | C21  | 1.417(3)   | C36  | C37  | 1.381(4) |
| C12  | C31  | 1.392(3)   | C36  | C46  | 1.399(4) |
| C12  | C39  | 1.393(3)   | C38  | C64  | 1.514(4) |
| N14  | C17  | 1.431(3)   | C40  | C63  | 1.377(4) |
| N15  | N16  | 1.266(3)   | C42  | C63  | 1.396(4) |
| N15  | C22  | 1.417(3)   | C43  | C46  | 1.380(4) |
| N16  | C47  | 1.432(3)   | C45  | C57  | 1.399(4) |
| C17  | C35  | 1.390(4)   | C45  | C59  | 1.375(4) |
| C17  | C39  | 1.391(3)   | C46  | C52  | 1.512(4) |
| C18  | C20  | 1.391(4)   | C47  | C58  | 1.382(4) |
| C18  | C29  | 1.396(4)   | C48  | C58  | 1.383(4) |
| O2   | C42  | 1.348(3)   | C49  | C56  | 1.380(4) |
| C20  | C47  | 1.391(4)   | C50  | C57  | 1.382(4) |
| C21  | C25  | 1.398(4)   | C51  | C59  | 1.389(4) |
| C21  | C43  | 1.402(4)   | C55  | C62  | 1.509(4) |
| C22  | C23  | 1.406(4)   | C55  | C65  | 1.414(4) |
| C22  | C42  | 1.404(4)   | C57  | C61  | 1.522(4) |
| C23  | C34  | 1.380(4)   | C61  | C65  | 1.512(4) |
| C24  | C26  | 1.397(4)   | C12  | C69  | 1.761(5) |
| C24  | C38  | 1.403(4)   | C13  | C69  | 1.759(5) |
| C24  | C52  | 1.522(4)   | C15  | C69  | 1.737(5) |
| C25  | C37  | 1.399(4)   | C14  | C66  | 1.743(6) |
| C26  | C60  | 1.522(4)   | C18  | C66  | 1.712(6) |

|     |     |          |      |      |           |
|-----|-----|----------|------|------|-----------|
| C26 | C65 | 1.403(4) | C113 | C66  | 1.751(6)  |
| C27 | C44 | 1.394(4) | O0AA | C102 | 1.151(14) |
| C27 | C49 | 1.405(3) | C101 | C102 | 1.538(14) |
| C28 | C38 | 1.404(4) | O1AA | C105 | 1.180(16) |
| C28 | C54 | 1.521(4) | C103 | C102 | 1.492(14) |
| C28 | C55 | 1.398(4) | C104 | C105 | 1.500(16) |
| C29 | C48 | 1.388(4) | C105 | C106 | 1.523(17) |
| C30 | C33 | 1.393(4) |      |      |           |

**Table S3** Bond angles for **6**.

| Atom | Atom | Atom | Angle/°    | Atom | Atom | Atom | Angle/°  |
|------|------|------|------------|------|------|------|----------|
| O1   | P1   | C12  | 112.10(12) | C37  | C36  | C46  | 122.0(2) |
| O1   | P1   | C18  | 111.64(12) | C36  | C37  | C25  | 120.1(3) |
| O1   | P1   | C27  | 112.24(11) | C24  | C38  | C28  | 119.8(3) |
| C18  | P1   | C12  | 107.88(11) | C24  | C38  | C64  | 119.4(3) |
| C27  | P1   | C12  | 105.97(12) | C28  | C38  | C64  | 120.8(3) |
| C27  | P1   | C18  | 106.66(12) | C17  | C39  | C12  | 119.8(2) |
| N41  | N10  | C33  | 115.0(2)   | C63  | C40  | C34  | 121.7(3) |
| N14  | N11  | C21  | 114.3(2)   | N10  | N41  | C32  | 114.4(2) |
| C31  | C12  | P1   | 116.61(18) | O2   | C42  | C22  | 123.2(3) |
| C31  | C12  | C39  | 119.5(2)   | O2   | C42  | C63  | 117.9(2) |
| C39  | C12  | P1   | 123.9(2)   | C63  | C42  | C22  | 118.9(3) |
| N11  | N14  | C17  | 112.3(2)   | C46  | C43  | C21  | 121.2(3) |
| N16  | N15  | C22  | 114.6(2)   | C33  | C44  | C27  | 119.8(2) |
| N15  | N16  | C47  | 114.6(2)   | C59  | C45  | C57  | 122.0(3) |
| C35  | C17  | N14  | 123.1(2)   | C36  | C46  | C52  | 118.6(2) |
| C35  | C17  | C39  | 120.7(2)   | C43  | C46  | C36  | 117.7(3) |
| C39  | C17  | N14  | 116.1(2)   | C43  | C46  | C52  | 123.4(3) |
| C20  | C18  | P1   | 123.3(2)   | C20  | C47  | N16  | 122.6(2) |
| C20  | C18  | C29  | 119.7(2)   | C58  | C47  | N16  | 116.7(2) |
| C29  | C18  | P1   | 117.0(2)   | C58  | C47  | C20  | 120.6(3) |
| C47  | C20  | C18  | 119.5(3)   | C58  | C48  | C29  | 120.0(3) |
| C25  | C21  | N11  | 115.6(2)   | C56  | C49  | C27  | 119.9(3) |
| C25  | C21  | C43  | 120.3(2)   | C57  | C50  | C32  | 121.4(3) |
| C43  | C21  | N11  | 123.8(2)   | O3   | C51  | C32  | 122.6(3) |
| C23  | C22  | N15  | 115.5(2)   | O3   | C51  | C59  | 118.6(3) |
| C42  | C22  | N15  | 124.8(2)   | C59  | C51  | C32  | 118.8(3) |
| C42  | C22  | C23  | 119.6(3)   | C46  | C52  | C24  | 118.7(2) |
| C34  | C23  | C22  | 121.5(2)   | C35  | C53  | C31  | 120.6(2) |
| C26  | C24  | C38  | 120.0(3)   | C28  | C54  | C34  | 115.5(2) |
| C26  | C24  | C52  | 120.4(2)   | C28  | C55  | C62  | 119.9(3) |
| C38  | C24  | C52  | 119.4(3)   | C28  | C55  | C65  | 119.5(3) |
| O4   | C25  | C21  | 124.7(2)   | C65  | C55  | C62  | 120.5(3) |
| O4   | C25  | C37  | 116.8(2)   | C49  | C56  | C30  | 120.7(3) |
| C21  | C25  | C37  | 118.5(3)   | C45  | C57  | C61  | 118.9(3) |
| C24  | C26  | C60  | 119.8(3)   | C50  | C57  | C45  | 117.7(3) |
| C24  | C26  | C65  | 120.0(2)   | C50  | C57  | C61  | 123.3(3) |
| C65  | C26  | C60  | 120.1(3)   | C47  | C58  | C48  | 120.0(3) |
| C44  | C27  | P1   | 122.40(19) | C45  | C59  | C51  | 120.5(3) |
| C44  | C27  | C49  | 119.7(3)   | C65  | C61  | C57  | 118.0(2) |
| C49  | C27  | P1   | 117.9(2)   | C40  | C63  | C42  | 120.3(3) |
| C38  | C28  | C54  | 119.8(3)   | C26  | C65  | C55  | 119.9(3) |
| C55  | C28  | C38  | 120.4(3)   | C26  | C65  | C61  | 120.7(3) |
| C55  | C28  | C54  | 119.7(3)   | C55  | C65  | C61  | 119.2(3) |
| C48  | C29  | C18  | 120.1(3)   | C13  | C69  | C12  | 108.2(3) |

|     |     |     |          |      |      |      |           |
|-----|-----|-----|----------|------|------|------|-----------|
| C56 | C30 | C33 | 119.8(3) | C15  | C69  | C12  | 111.7(3)  |
| C12 | C31 | C53 | 120.0(2) | C15  | C69  | C13  | 111.7(3)  |
| C50 | C32 | N41 | 115.5(3) | C14  | C66  | C113 | 109.5(3)  |
| C50 | C32 | C51 | 119.5(3) | C18  | C66  | C14  | 110.7(3)  |
| C51 | C32 | N41 | 125.0(2) | C18  | C66  | C113 | 111.5(4)  |
| C30 | C33 | N10 | 116.5(3) | O0AA | C102 | C101 | 124.3(13) |
| C30 | C33 | C44 | 120.2(3) | O0AA | C102 | C103 | 122.4(13) |
| C44 | C33 | N10 | 123.2(2) | C103 | C102 | C101 | 113.0(14) |
| C23 | C34 | C40 | 117.8(2) | O1AA | C105 | C104 | 130.9(18) |
| C23 | C34 | C54 | 123.5(2) | O1AA | C105 | C106 | 128.6(17) |
| C40 | C34 | C54 | 118.7(2) | C104 | C105 | C106 | 99.9(16)  |
| C53 | C35 | C17 | 119.3(2) |      |      |      |           |

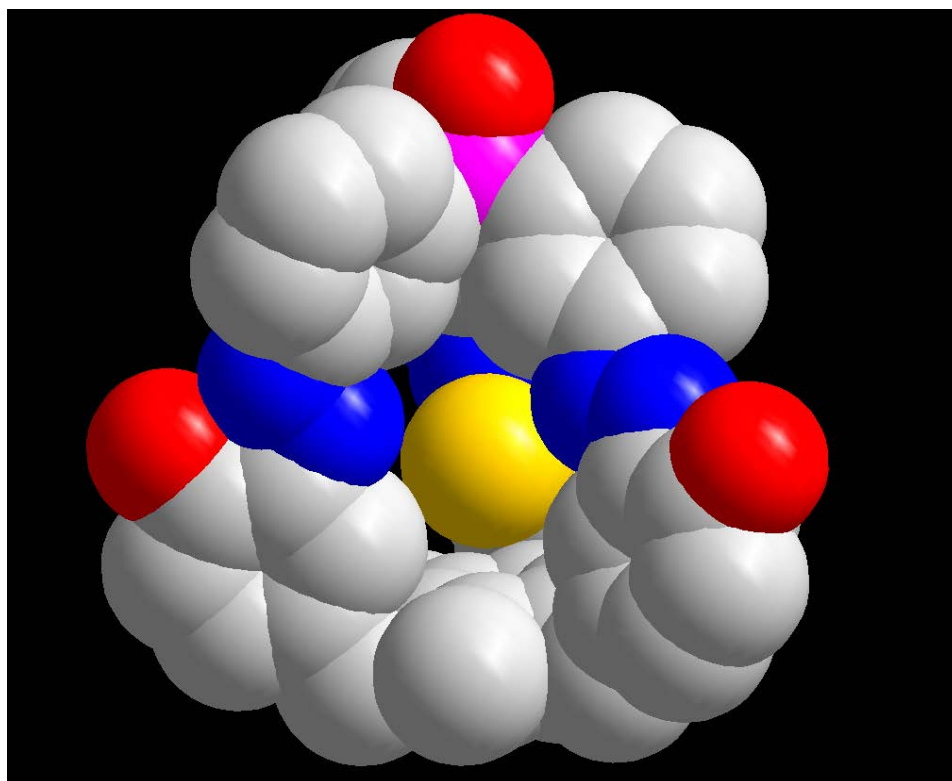

**Fig. S9** The space filling model of **6**. Red, gray, blue and purple sphere represent O, C, N, and P, respectively. Yellow sphere highlights the internal cavity. Hydrogen atoms and solvent molecules are omitted for clarity.

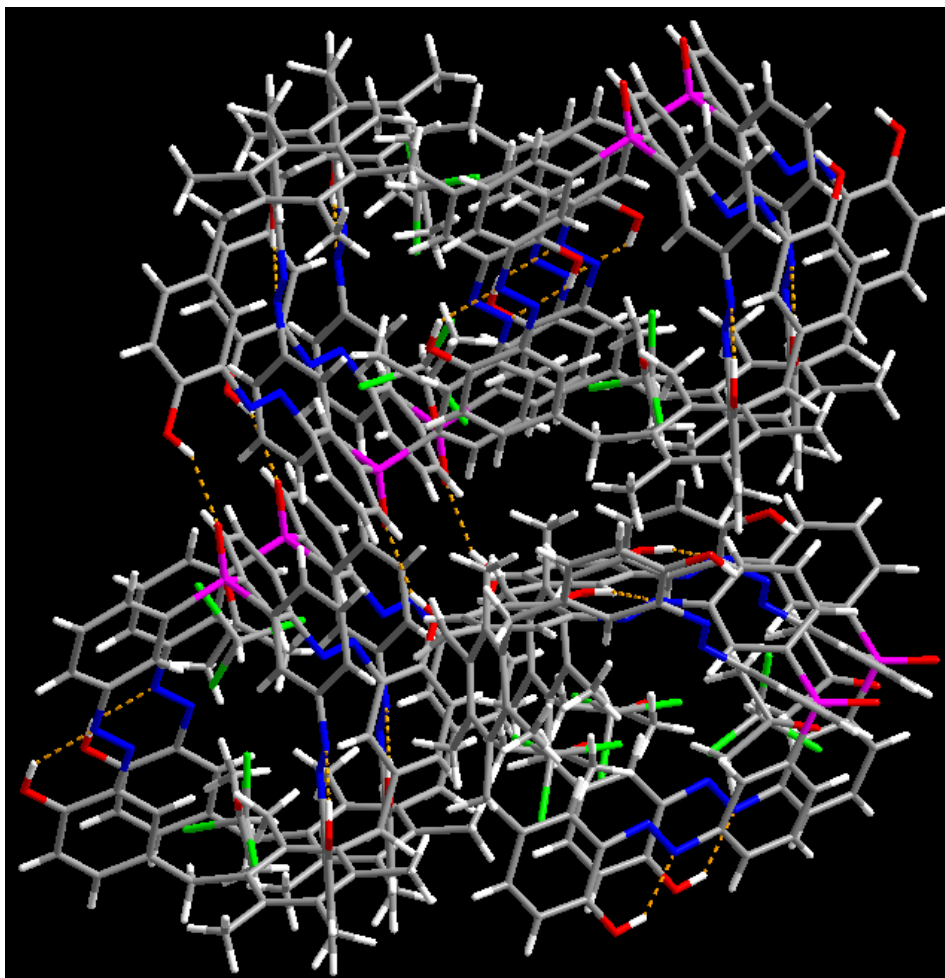

**Fig. S10** A representation of the packing wires/sticks model of **6** shows only 8 cages. The two hydroxyl groups in each cage form intramolecular hydrogen bond with their own azo bonds. Another hydroxyl group forms intermolecular hydrogen bond with the P=O group. This White, Red, gray, blue and purple atoms represent H, O, C, N, and P, respectively.

## 7. Supporting reference

1. D. Ma, Z. Chen, L. Yi and Z. Xi, *RSC Adv.*, 2019, **9**, 29070-29077.
2. S. Kotha and K. Mandal, *Eur. J. Org. Chem.*, 2006, **2006**, 5387-5393.
3. D. Ma, Y. Xie, J. Zhang, D. Ouyang, L. Yi and Z. Xi, *Chem. Commun.*, 2014, **50**, 15581-15584.
4. O. V. Dolomanov, L. J. Bourhis, R. J. Gildea, J. A. K. Howard and H. Puschmann, *J. Appl. Cryst.*, 2009, **42**, 339-341.
5. G. M. Sheldrick, *SHELXL-97, Program for X-ray Crystal Structure Refinement*; Utrecht University: Utrecht, The Netherlands, 1998.

## 8. Supplementary NMR and HRMS spectra

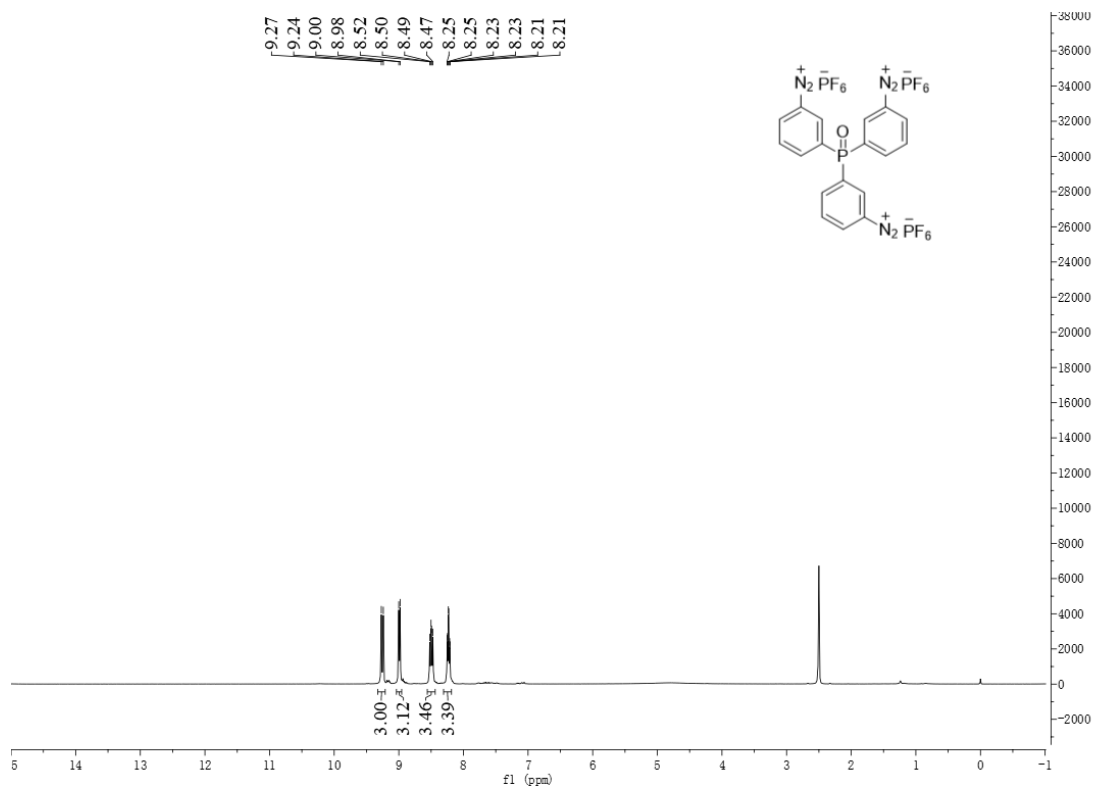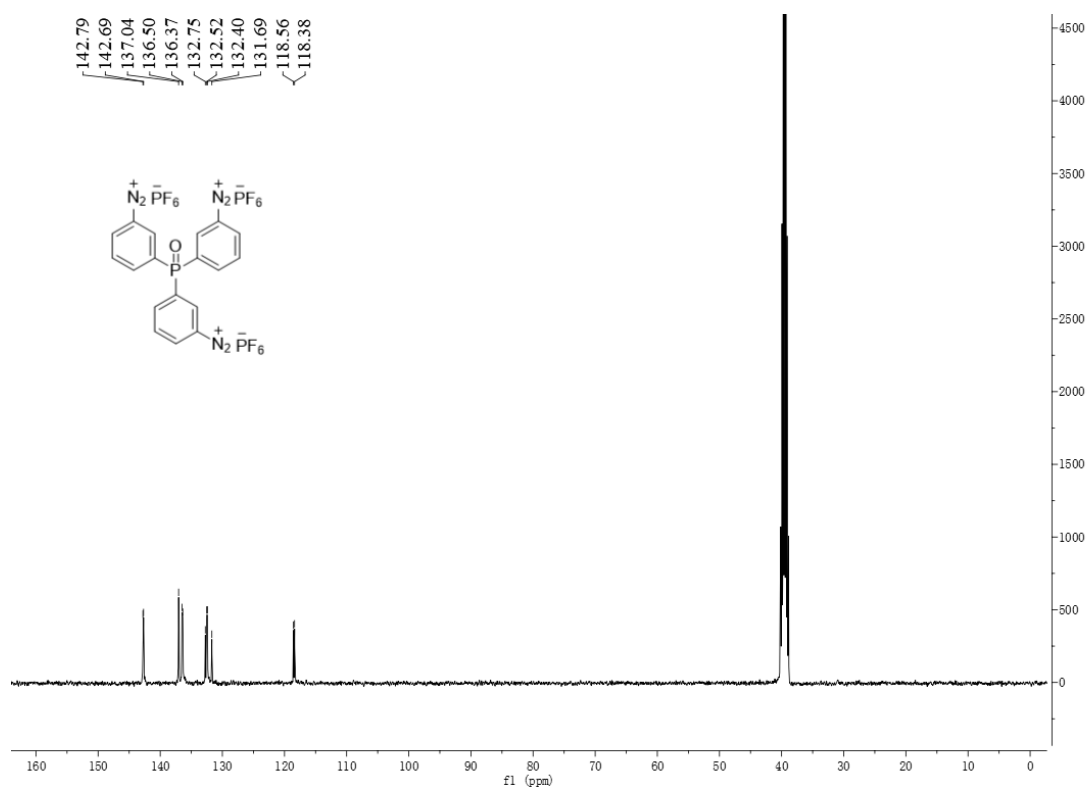



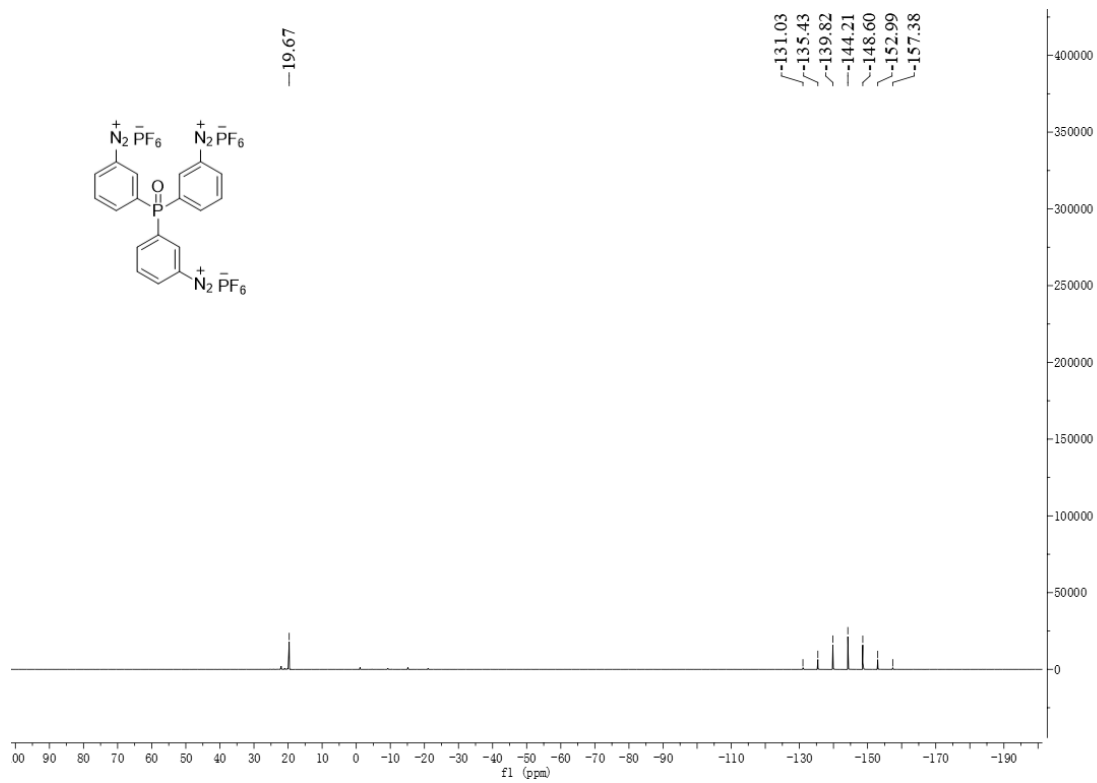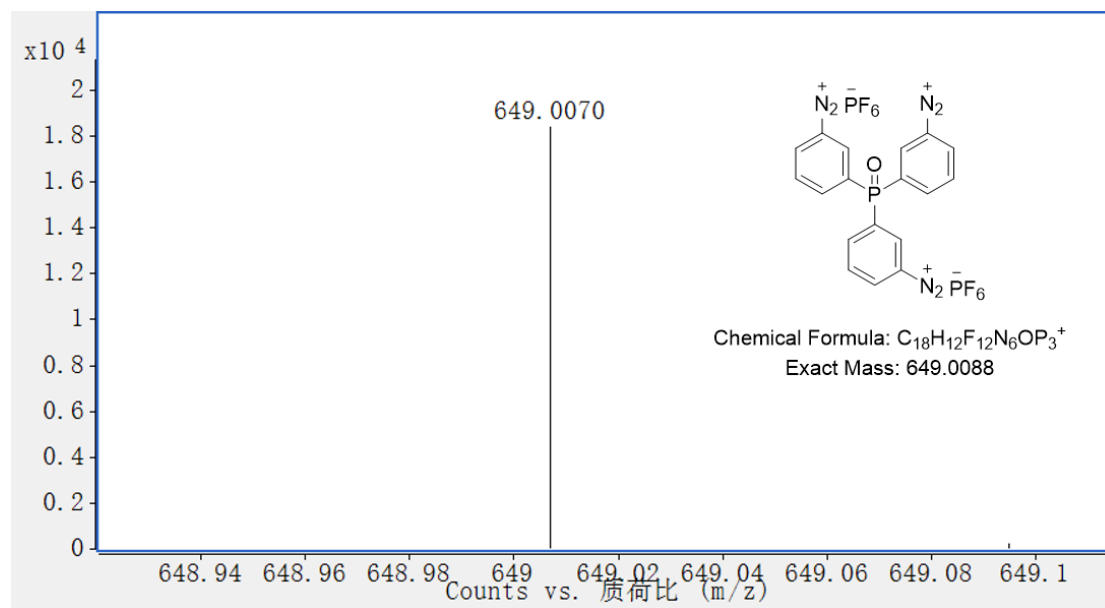

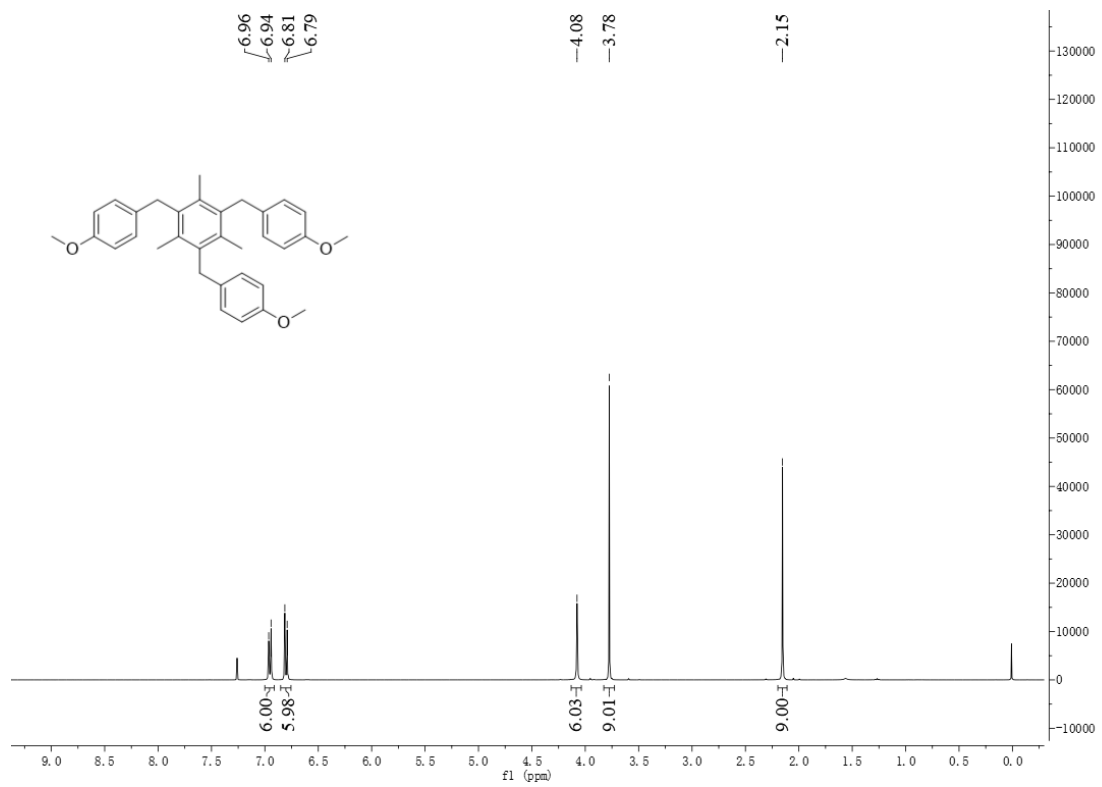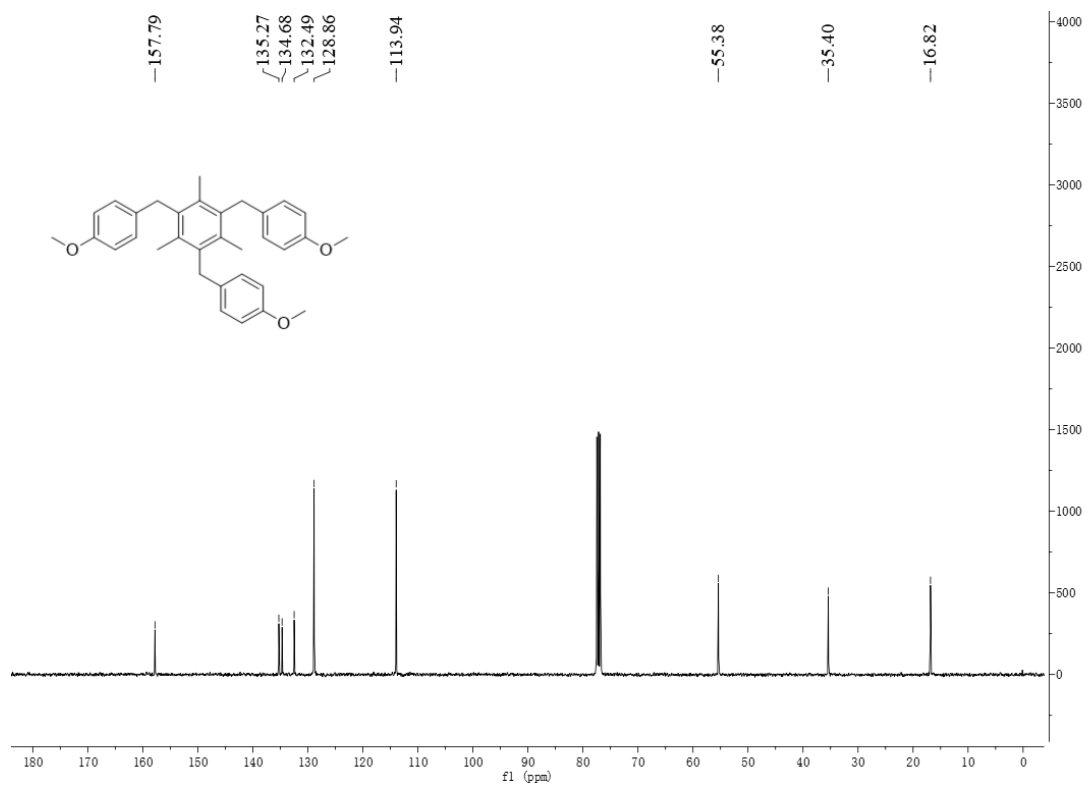

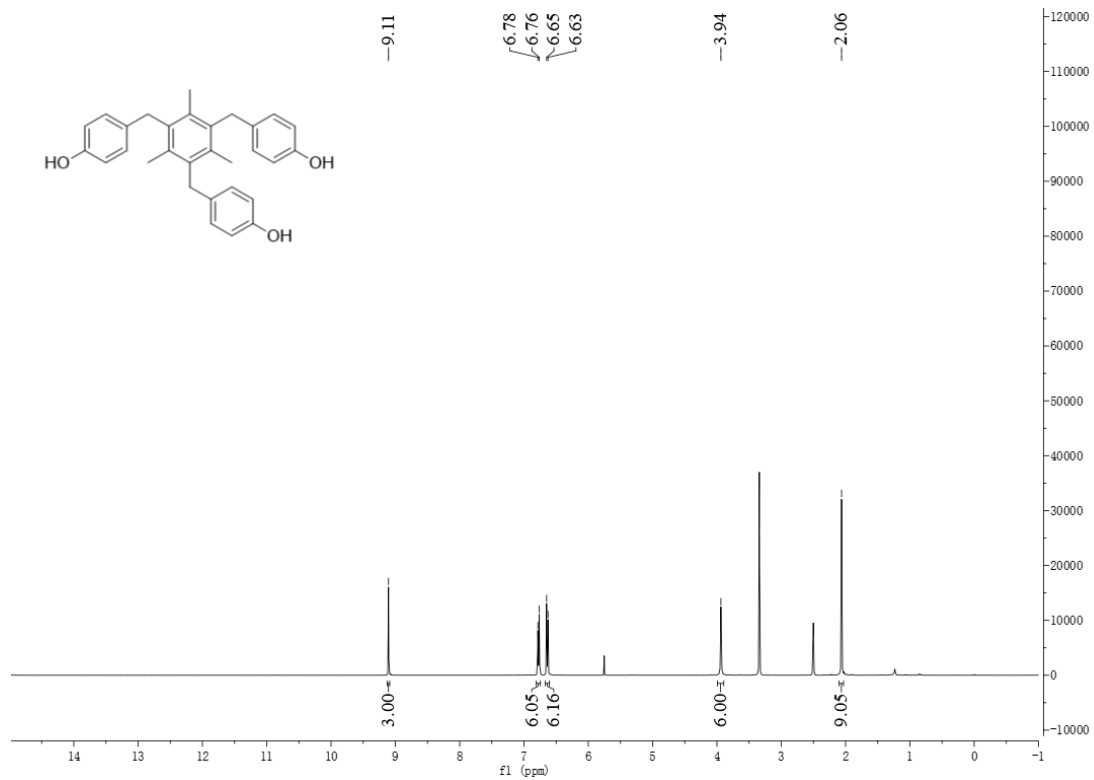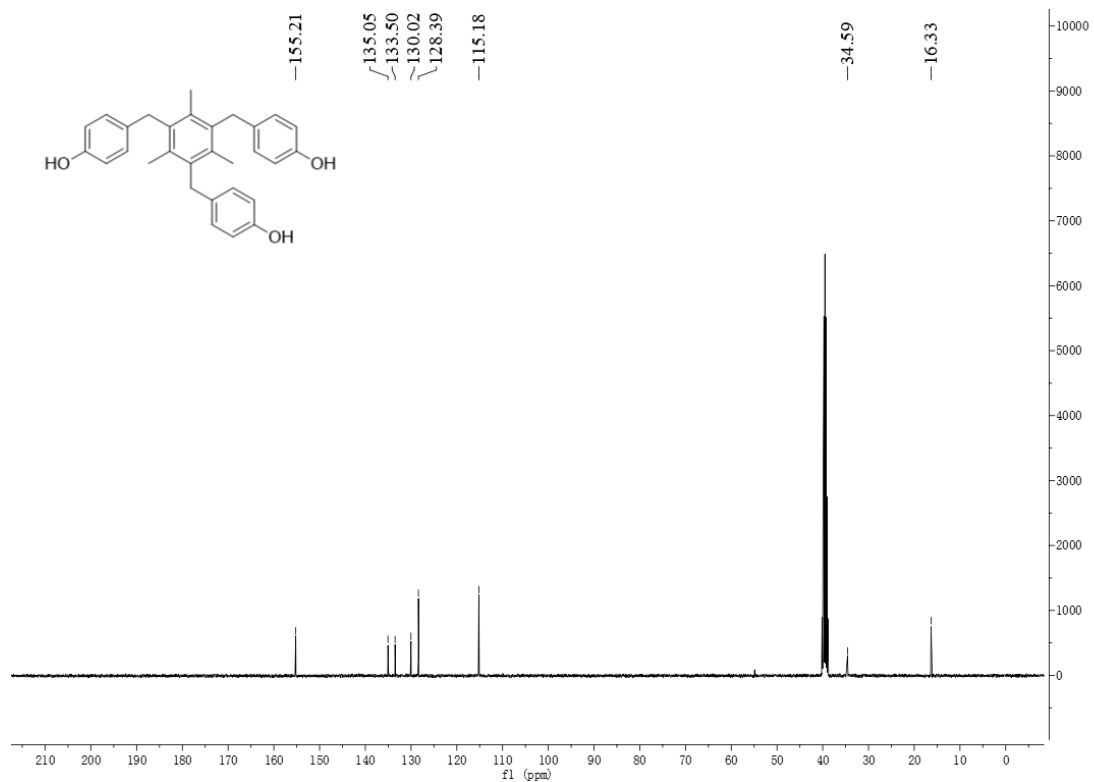

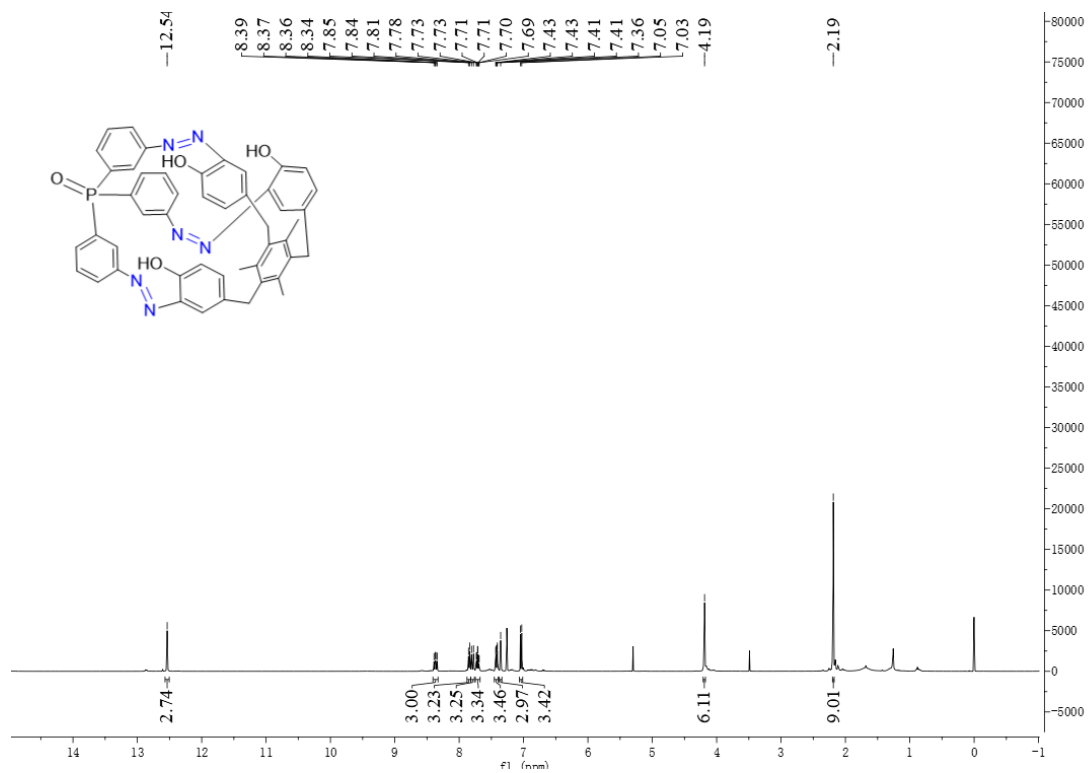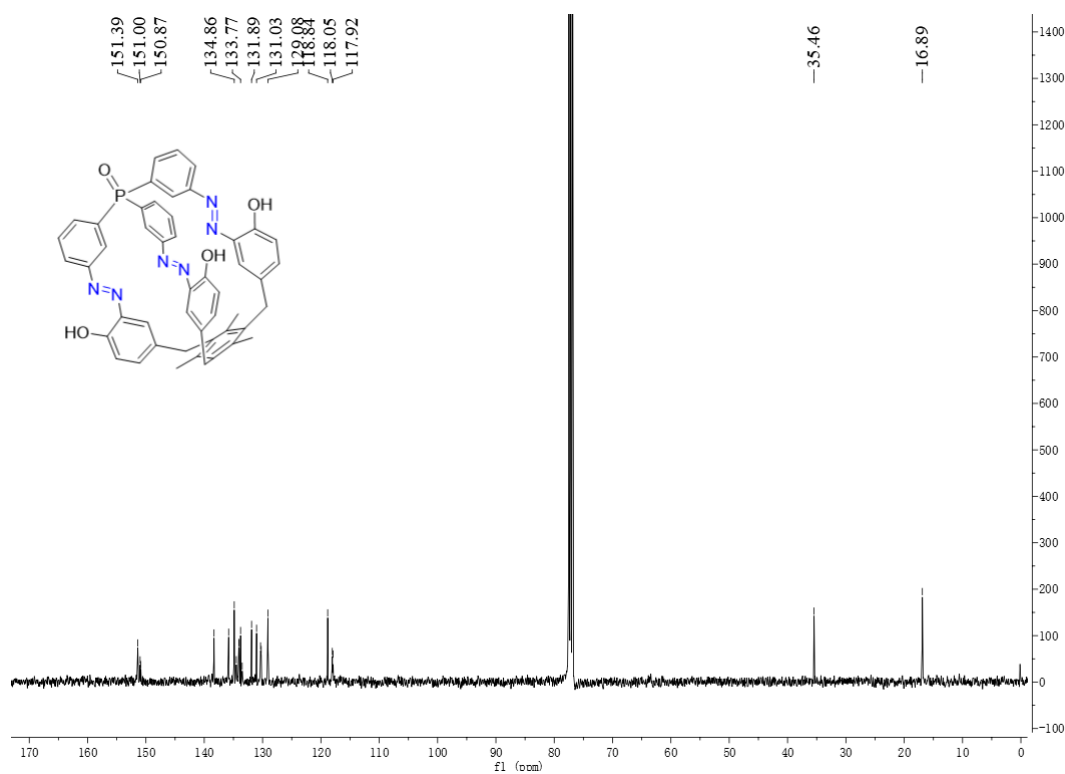

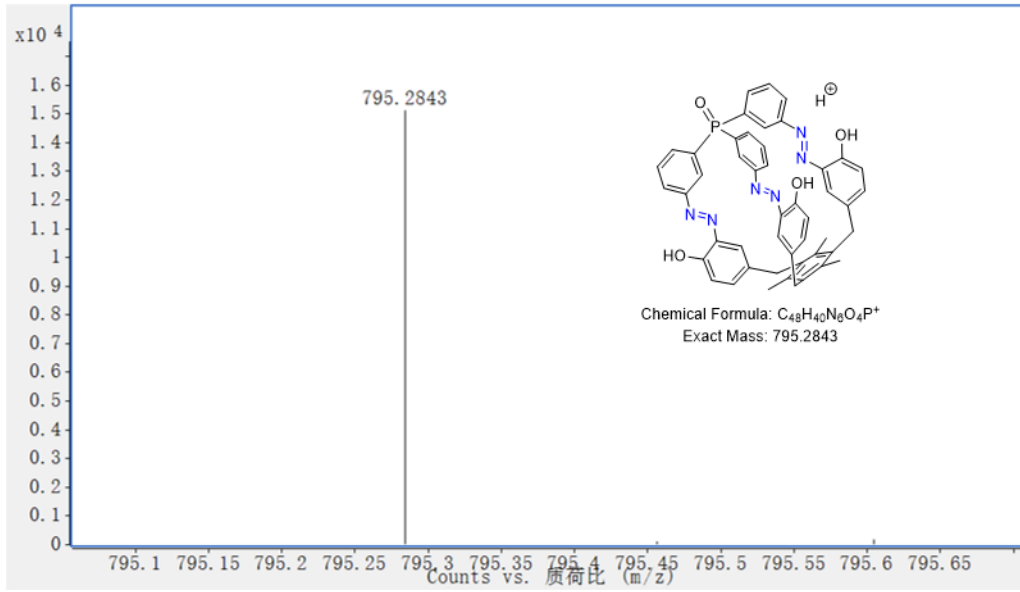

Supplement: d2ob01583h1.pdf [file d2ob01583h1.pdf]
